# Supplementary material for: Exploring indoor and outdoor dust as a potential tool for detection and monitoring of COVID-19 transmission
Source: PubMed Central journal article supplement — iScience. 2024 Jan 26;27(3):109043. doi: 10.1016/j.isci.2024.109043 (PMC10875567; doi:10.1016/j.isci.2024.109043), 2024-01-26
Supplement: mmc1.pdf [file mmc1.pdf]

## **Supplemental information**

### **Exploring indoor and outdoor dust as a potential tool for detection and monitoring of COVID-19 transmission**

**Suparinthon Anupong, Sudarat Chadsuthi, Parichart Hongsing, Cameron Hurst, Phatthranit Phattharapornjaroen, Ali Hosseini Rad S.M., Stefan Fernandez, Angkana T. Huang, Porames Vatanaprasan, Thammakorn Saethang, Sirirat Luk-in, Robin James Storer, Puey Ounjai, Naveen Kumar Devanga Ragupathi, Phitsanuruk Kanthawee, Natharin Ngamwongsatit, Vishnu Nayak Badavath, Wanwara Thuptimjang, Asada Leelahavanichkul, Talerngsak Kanjanabuch, Kazuhiko Miyana, Longzhu Cui, Asuka Nanbo, Kenji Shibuya, Rosalyn Kupwiwat, Daisuke Sano, Takashi Furukawa, Kazunari Sei, Paul G. Higgins, Anthony Kicic, Andrew C. Singer, Tanittha Chatsuwana, Sam Trowsdale, Shuichi Abe, Hitoshi Ishikawa, Mohan Amarasiri, Charin Modchang, and Dhammika Leshan Wannigama**

## Supporting information

**Table S1.** Population data of Bangkok Metropolis. Statistical population data based on data from the Department of Provincial Affairs and National Statistical Office, Thailand.

| Province | Administrative Area | Population                  |
|----------|---------------------|-----------------------------|
|          |                     | (2017 National Stat Office) |
| Bangkok  | Bang Kapi           | 148465                      |
|          | Bang Na             | 95912                       |
|          | Bang Rak            | 45875                       |
|          | Chatuchak           | 160906                      |
|          | Huai Khwang         | 78175                       |
|          | Khlong San          | 76446                       |
|          | Khlong Toei         | 109041                      |
|          | Lat Phrao           | 122182                      |
|          | Pathum Wan          | 53263                       |
|          | Phasi Charoen       | 129827                      |
|          | Phaya Thai          | 72952                       |
|          | Phra Khanong        | 93482                       |
|          | Phra Nakhon         | 57876                       |
|          | Ratchathewi         | 73035                       |
|          | Samphanthawong      | 27452                       |
|          | Sathon              | 84916                       |
|          | Yan Nawa            | 81521                       |

a)

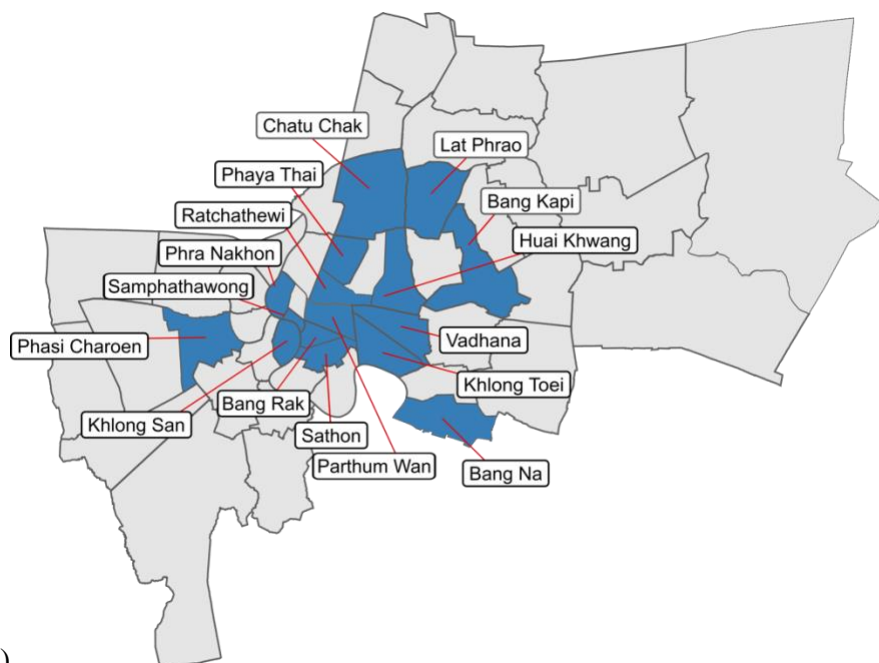

b)

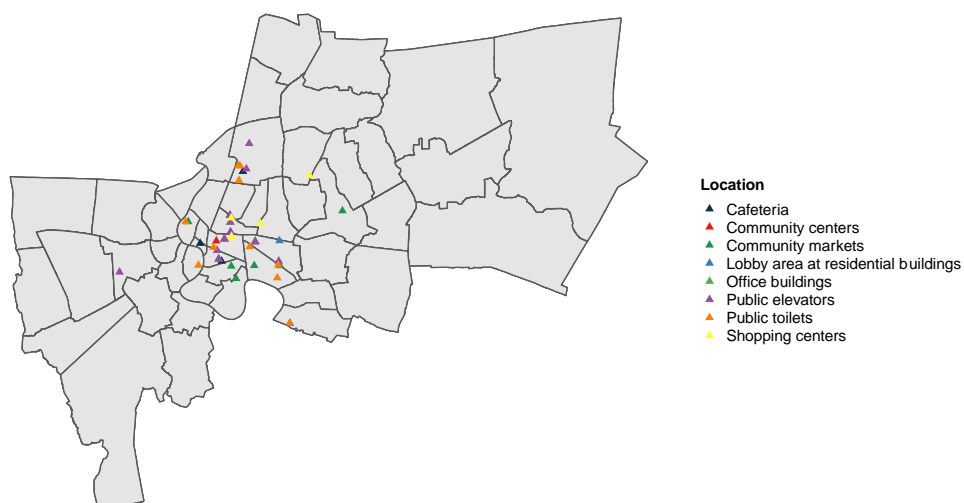

**Figure S1. Map of locations where dust was collected. a) Details of the administrative area were samples collected b) Details of the sampling locations**

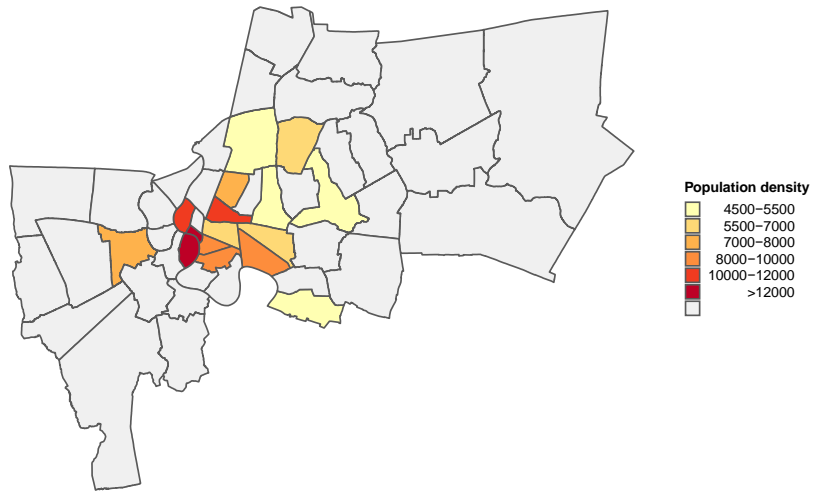

**Figure S2. Map showing the population density (person per square kilometer).**

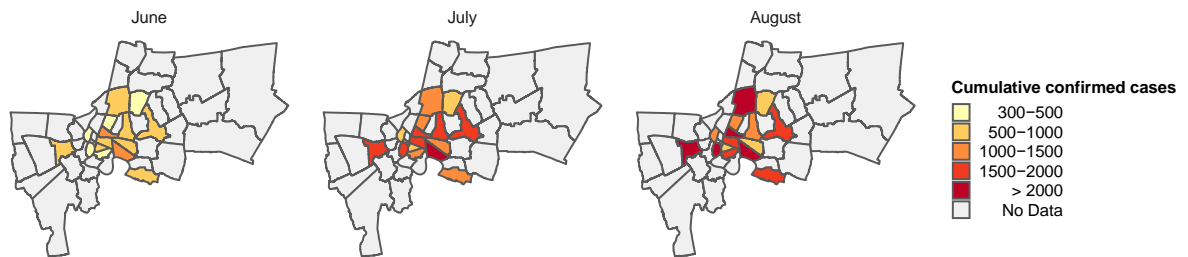

**Figure S3. Map showing cumulative confirmed cases in June, July, and August.**

## Viral concentrations from dust in different districts and locations

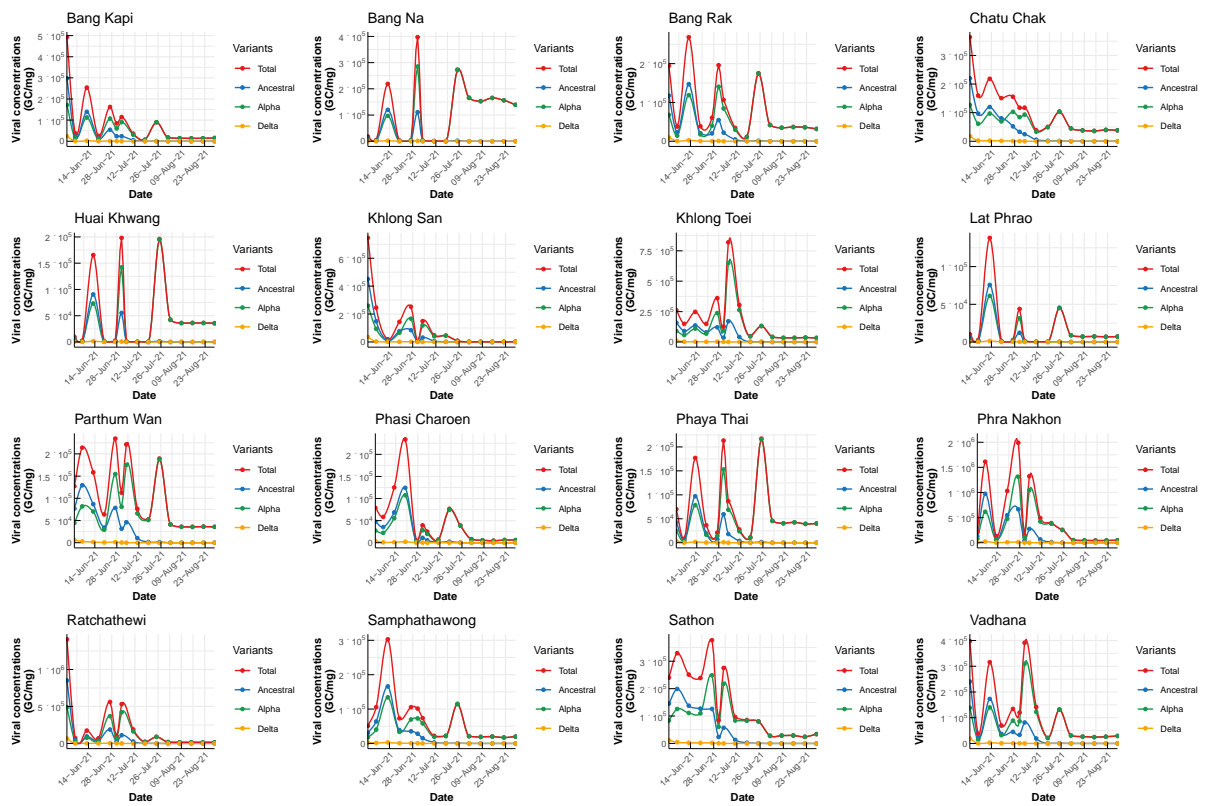

Figure S4. Average viral concentrations in 16 districts of Bangkok.

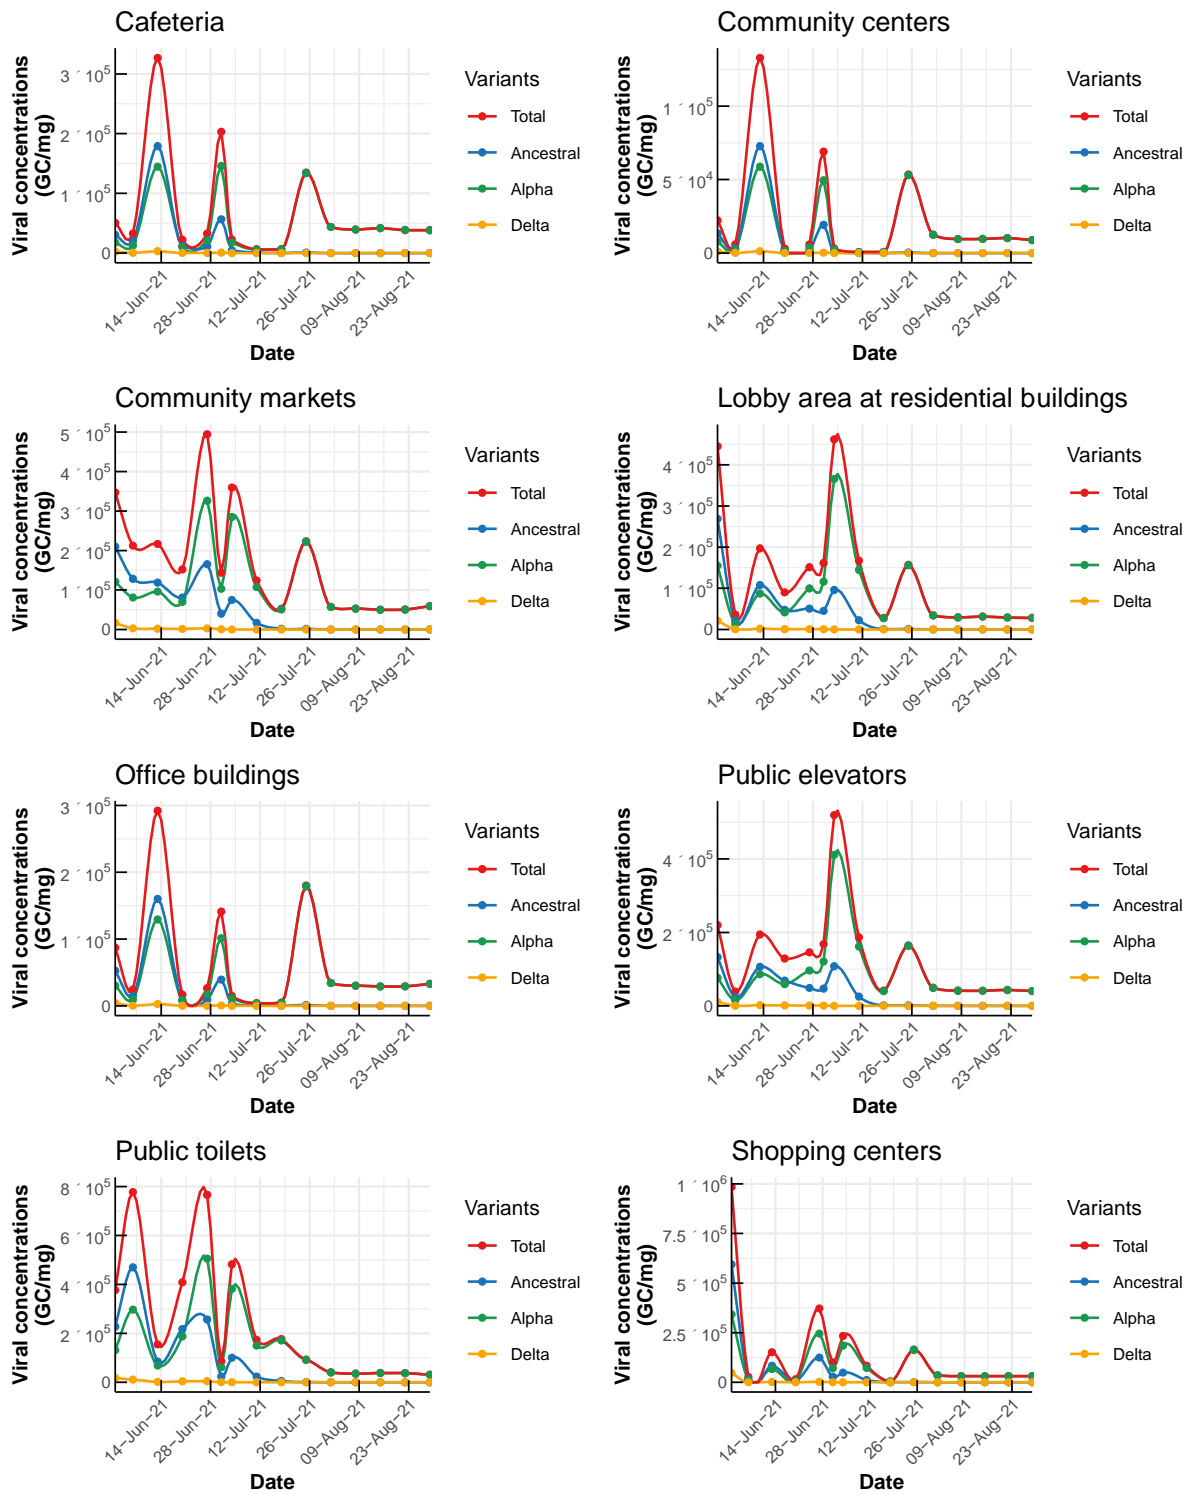

**Figure S5. Average viral concentrations classified according to location type.**

## Relative risk of infection

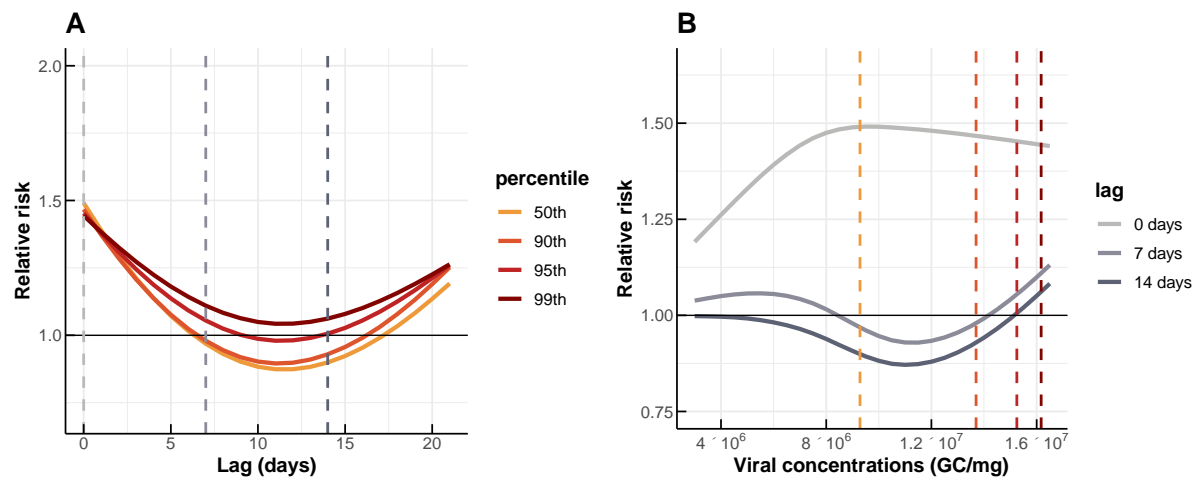

**Figure S6. SARS-CoV-2 viral concentrations from dust and transmission ( $R_t$ ) associations: A. at the 50<sup>th</sup>, 90<sup>th</sup>, 95<sup>th</sup>, and 99<sup>th</sup> percentile of total viral concentrations, and B) at the lags of 0, 7, and 14 days, respectively.**

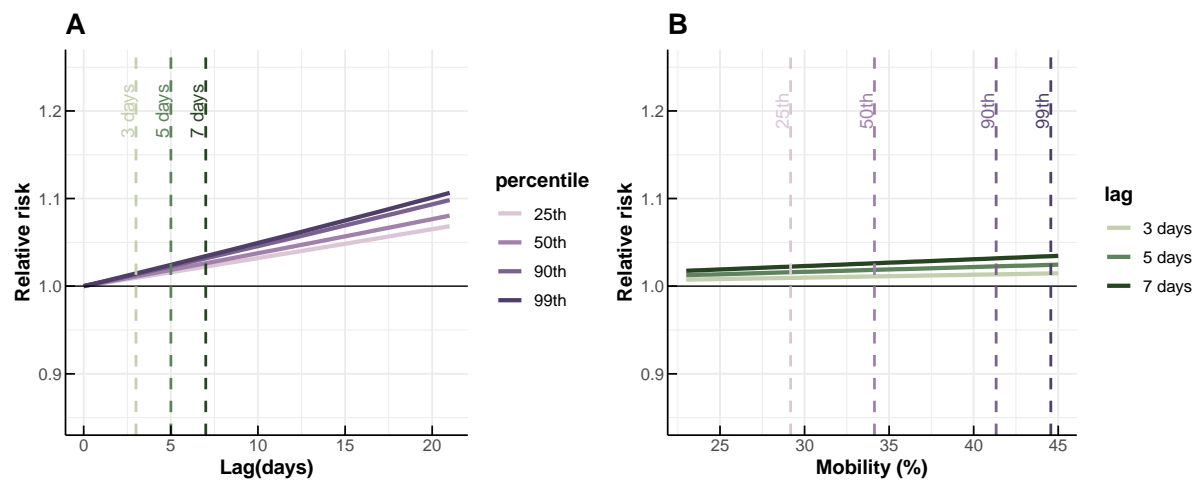

**Figure S7. Mobility changes (%) and transmission ( $R_t$ ) associations: A. at the 25<sup>th</sup>, 50<sup>th</sup>, 90<sup>th</sup>, and 99<sup>th</sup> percentile of mobility changes (%), and B. at the lags of 0, 7, and 14 days, respectively.**

**District-specific effects of total viral concentrations from dust on effective reproduction number,  $R_t$**

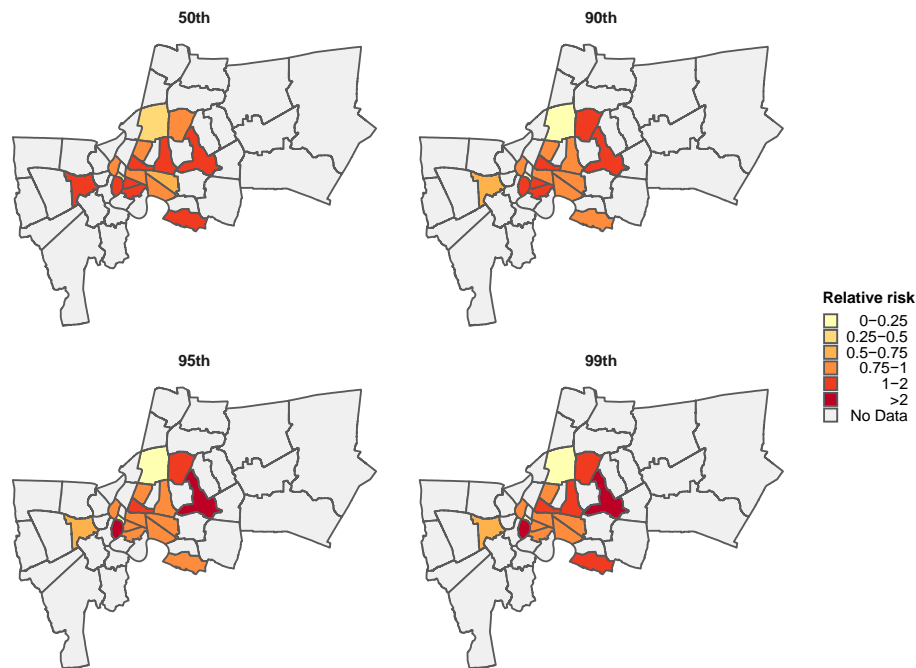

**Figure S8. District-specific association of viral concentrations and effective reproduction number ( $R_t$ ) at a lag of 0 day.** The relative risk (RR) of confirmed cases associated with total viral concentrations at the 50<sup>th</sup>, 90<sup>th</sup>, 95<sup>th</sup>, and 99<sup>th</sup> percentiles of district-specific viral concentrations are shown relative to 0 gene copy (no cases found in Bangkok).



**Table S2. Relative risk for district-specific at lag 0 day**

| Districts     | RR at 50 <sup>th</sup> | RR at 90 <sup>th</sup> | RR at 95 <sup>th</sup>  | RR at 99                    |
|---------------|------------------------|------------------------|-------------------------|-----------------------------|
| Bang Kapi     | 1.131<br>(0.762,1.677) | 1.782<br>(0.379,8.367) | 2.387<br>(0.265,21.534) | 26.362<br>(0.016,43185.246) |
| Bang Na       | 1.078<br>(1.030,1.127) | 0.960<br>(0.860,1.071) | 0.975<br>(0.878,1.084)  | 1.107 (0.982,1.247)         |
| Bang Rak      | 1.241<br>(0.917,1.680) | 1.067<br>(0.783,1.455) | 0.887<br>(0.471,1.669)  | 0.811 (0.364,1.805)         |
| Chatu Chak    | 0.371<br>(0.111,1.24)  | 0.060<br>(0.011,0.336) | 0.011<br>(0.001,0.084)  | 0.000 (0.000,0.002)         |
| Huai Khwang   | 1.035<br>(0.968,1.105) | 0.839<br>(0.530,1.329) | 0.937<br>(0.59,1.486)   | 1.133 (0.683,1.878)         |
| Khlong San    | 1.291<br>(1.038,1.604) | 1.334<br>(1.057,1.685) | 2.459<br>(0.363,16.671) | 6.607<br>(0.063,689.735)    |
| Khlong Toei   | 0.937<br>(0.752,1.167) | 0.855<br>(0.726,1.008) | 0.799<br>(0.676,0.945)  | 0.781 (0.659,0.925)         |
| Lat Phrao     | 0.964<br>(0.923,1.006) | 1.049<br>(0.907,1.214) | 1.097<br>(0.798,1.509)  | 1.114 (0.756,1.644)         |
| Parthum Wan   | 0.887<br>(0.395,1.995) | 0.880<br>(0.397,1.952) | 0.872<br>(0.386,1.97)   | 0.866 (0.377,1.988)         |
| Phasi Charoen | 1.003<br>(0.908,1.109) | 0.747<br>(0.632,0.882) | 0.679<br>(0.545,0.846)  | 0.653 (0.510,0.837)         |
| Phaya Thai    | 0.929<br>(0.831,1.038) | 0.992<br>(0.901,1.091) | 0.976<br>(0.875,1.089)  | 0.94 (0.796,1.111)          |

|                |                        |                        |                        |                         |
|----------------|------------------------|------------------------|------------------------|-------------------------|
| Phra Nakhon    | 0.891<br>(0.638,1.243) | 0.829<br>(0.629,1.092) | 0.898<br>(0.691,1.166) | 0.926 (0.712,1.205)     |
| Ratchathewi    | 1.059<br>(0.919,1.221) | 1.287<br>(0.985,1.681) | 1.384<br>(0.877,2.184) | 1.781<br>(0.252,12.594) |
| Samphanthawong | 0.416<br>(0.174,0.994) | 0.047<br>(0.006,0.336) | 0.002 (0,0.194)        | 0.001 (0.000,0.153)     |
| Sathon         | 1.338<br>(0.682,2.624) | 1.081<br>(0.659,1.774) | 0.986<br>(0.606,1.603) | 0.905 (0.544,1.507)     |
| Vadhana        | 0.712<br>(0.445,1.137) | 0.802<br>(0.541,1.191) | 0.765<br>(0.452,1.297) | 0.758 (0.434,1.323)     |
